# Supplementary material for: A fully transparent, flexible PEDOT:PSS–ITO–Ag–ITO based microelectrode array for ECoG recording
Source: Royal Society of Chemistry journal article supplement (doi:10.1039/d0lc01123a), 2021-01-01
Supplement: d0lc01123a1.pdf [file d0lc01123a1.pdf]

## Supplemental Materials

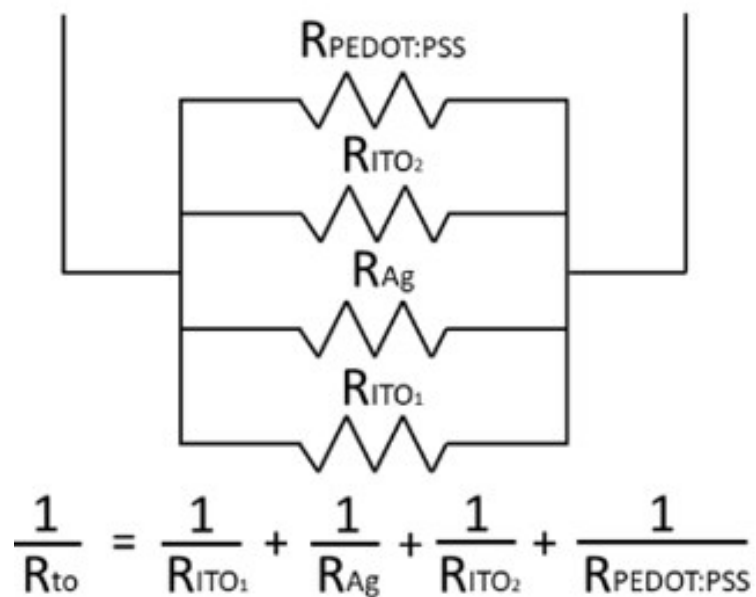

**Fig. S1** Equivalent circuit of the PEDOT:PSS-ITO-Ag-ITO assembly for the overall conductance calculation. Each layer of the thin film acts as a resistor and then is connected in parallel to form the total resistance. The measured sheet resistance of 20 nm ITO, 9.45 nm Ag, 24 nm ITO and 30.5 nm PEDOT:PSS was 305.2  $\Omega/\text{sq}$ , 10.28  $\Omega/\text{sq}$ , 254.2  $\Omega/\text{sq}$ , and >1000  $\Omega/\text{sq}$  (beyond the range of four-point probe), respectively.

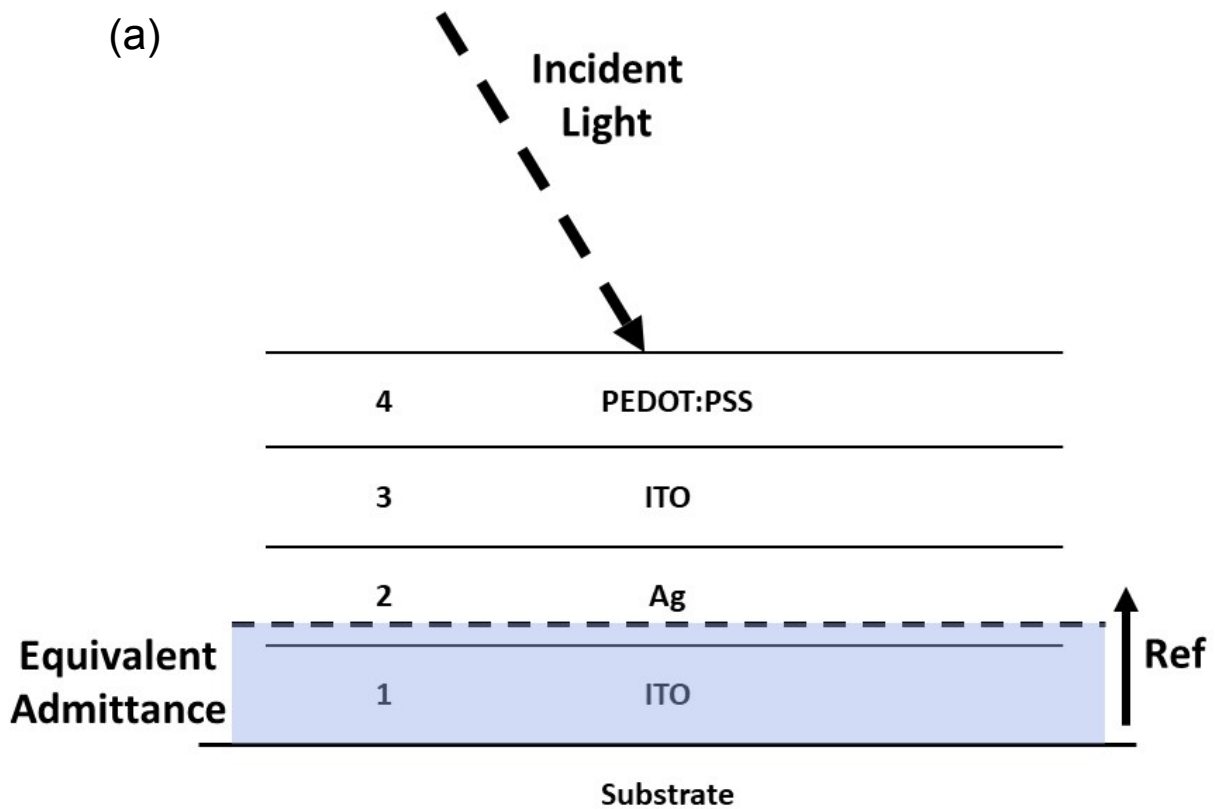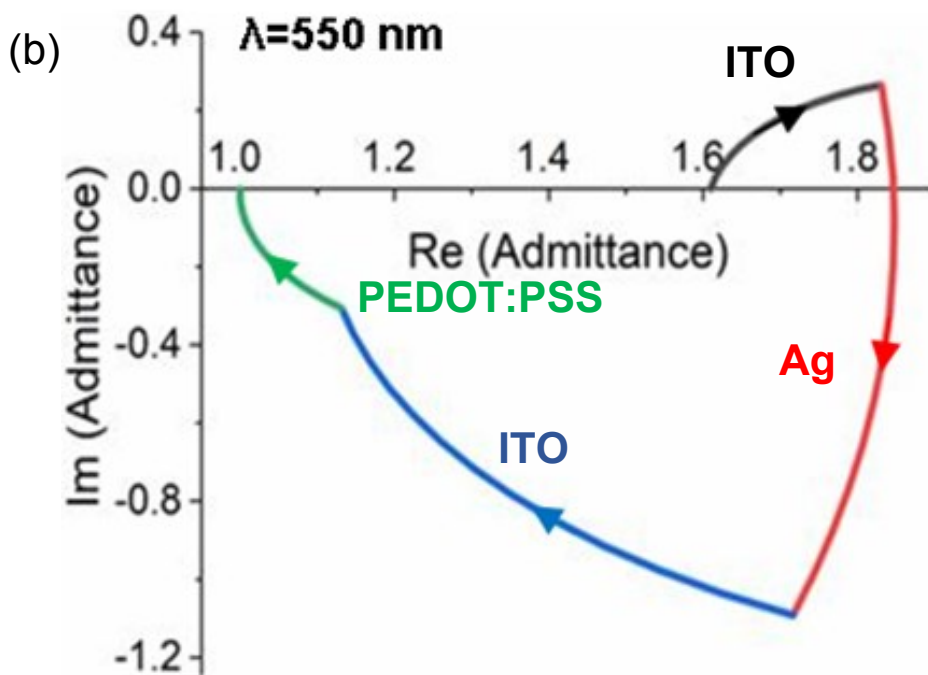

**Fig. S2.** **a** Equivalent admittance (blue shade) of the multilayer PEDOT:PSS-ITO-Ag-ITO thin film coatings. Treating as a virtual reference plane from the substrate. **b** Admittance loci with an example of PEDOT:PSS (30.5 nm)-ITO (24 nm)-Ag (9.45 nm)-ITO (20 nm) assembly for achieving the highest transmittance at the preferred 550 nm wavelength.

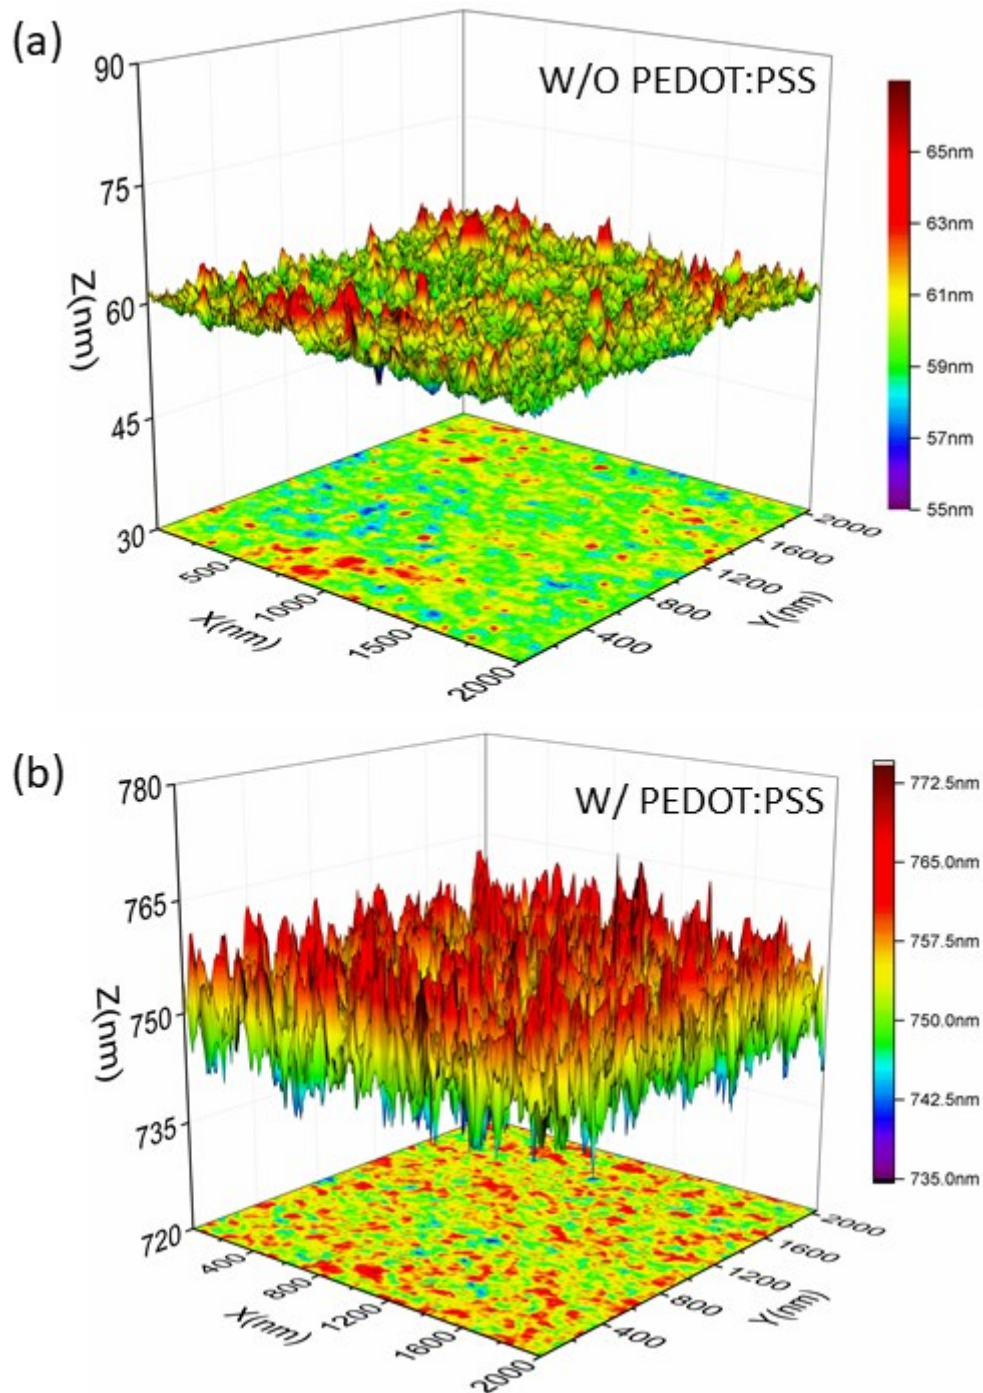

**Fig. S3.** Surface roughness changes **a** before and **b** after spin-coating PEDOT:PSS layer by Atomic force microscopy (AFM). The average roughness ( $R_a$ ) and peak-to-peak mean roughness depth ( $R_t$ ) without the PEDOT:PSS film is 0.85 nm and 12.02 nm, while  $R_a$  and  $R_t$  with the PEDOT:PSS film is 3.33 nm and 39.15 nm.

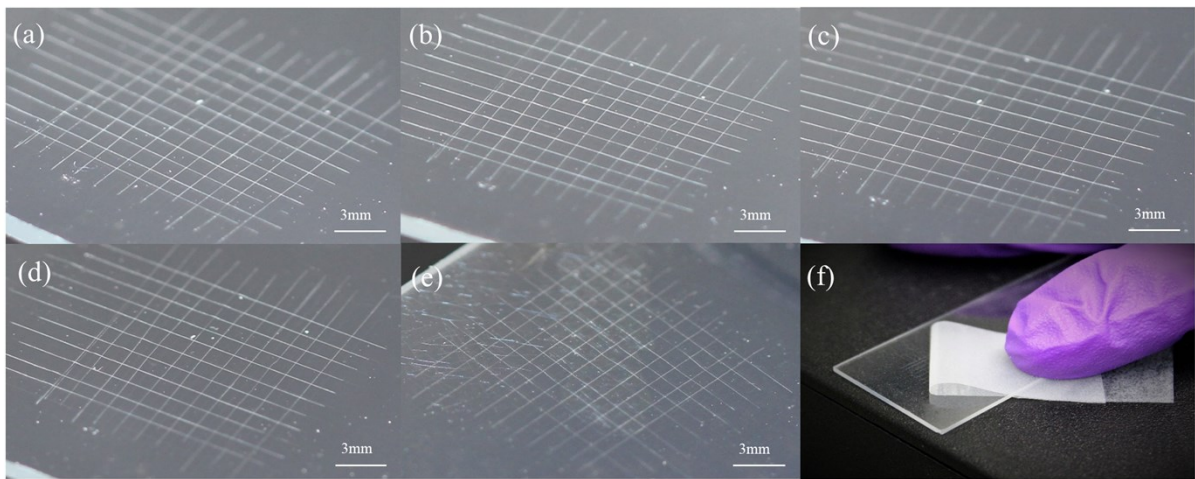

**Fig. S4.** Peel-off test photos of 100 1×1 mm<sup>2</sup> blade-scratched squares with **a** no peel-off, **b** one peel-off test, **c** 10 peel-off tests **d** 50 peel-off tests **e** Parylene C delamination after 50-time peel-off tests **f** the peeling-off method.

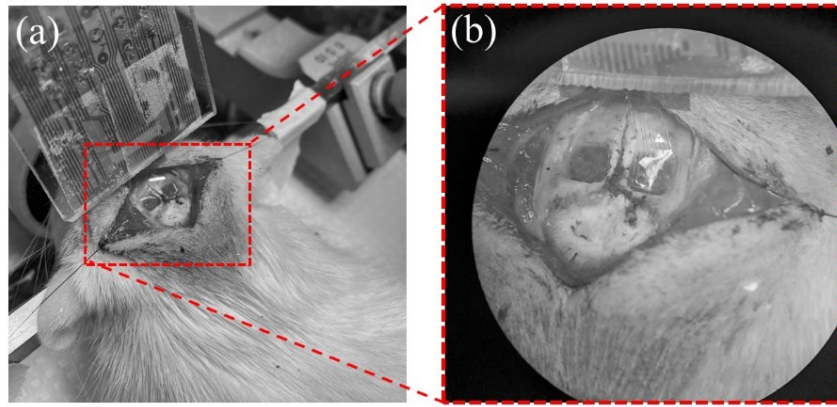

**Fig. S5.** **a** Image of a transparent  $\mu$ ECoG array placed on the brain tissue of the rat during the in vivo animal experiments. **b** Zoom-in microscope image shows the exposed brain tissue with the array attached.

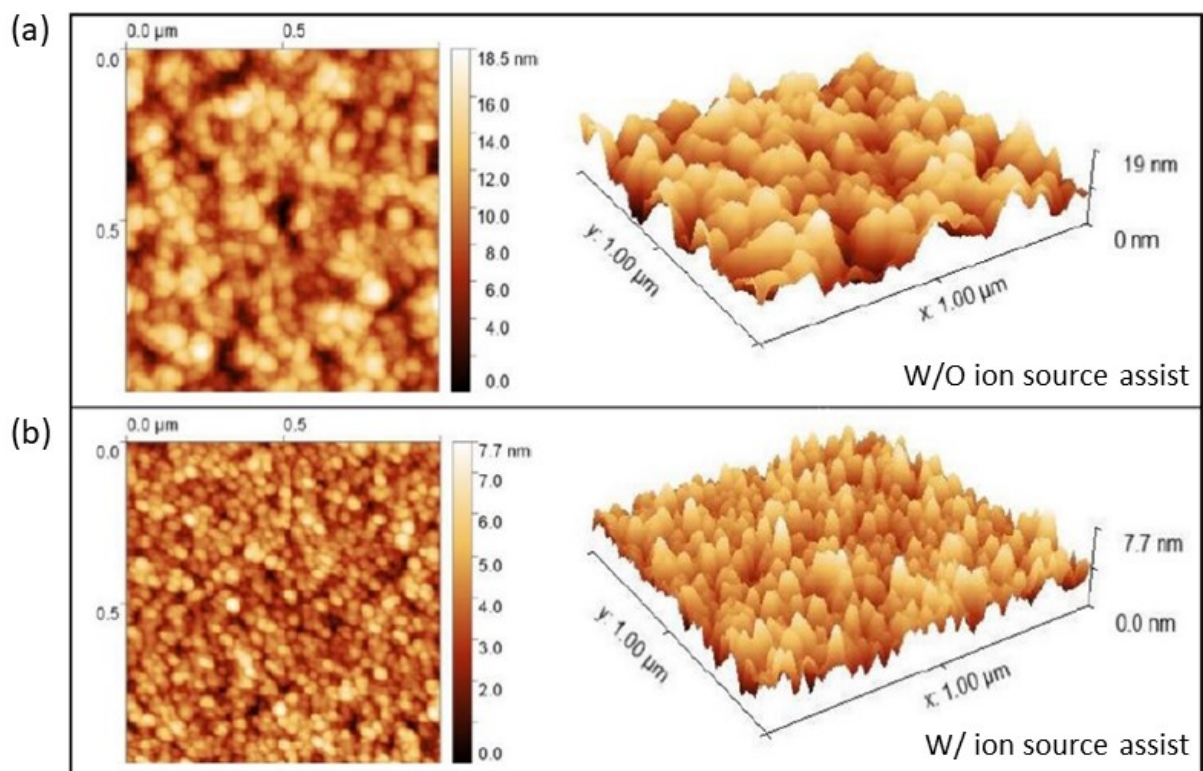

**Fig. S6.** Surface morphology of sputtered ITO **a** without and **b** with ion source assist, measured by atomic force microscopy (AFM). The ion source assisted ITO sputtering enables smoother and denser ITO thin films.

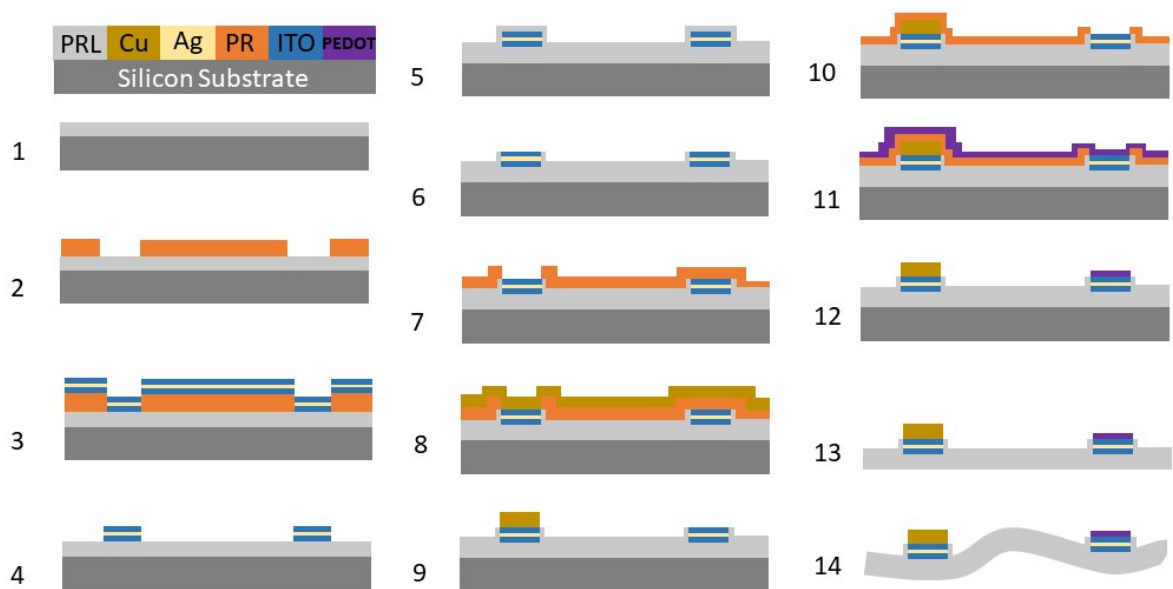

**Fig. S7**  $\mu$ ECoG array fabrication steps: **1** Deposit Parylene C. **2** Pattern the photoresist. **3** Deposit ITO-Ag-ITO thin films. **4** Wash off photoresist and pattern the ITO-Ag-ITO layer. **5** Deposit the second Parylene C layer. **6** Etch Parylene C selectively to exposure the electrode sites and contacts. **7** Pattern another layer of photoresist. **8** Deposit Cu. **9** Wash off photoresist and pattern Cu over the contact areas. **10** Pattern another layer of photoresist. **11** Deposit PEDOT:PSS. **12** Washing off photoresist to obtain the PEDOT:PSS patterns on the electrode sites. **13** Release the  $\mu$ ECoG array from silicon substrate. **14** Flexibility of the released  $\mu$ ECoG array.
